# Supplementary material for: Vanishing twin syndrome among ART singletons and pregnancy outcomes
Source: PubMed Central journal article supplement (PMC5850786; doi:10.1093/humrep/dex277), 2017-08-31
Supplement: dex277suppl_table1.pdf [file dex277suppl_table1.pdf]

**Supplementary Table S1 Birth weight and gestational age among ART singletons with and without VTS compared to ART multiples, among all ART deliveries in Norway between July 1984 and December 2013.**

| Outcome                                                                 | Exposure group                                                  | N      | Mean (SD)    | Overall analyses <sup>a</sup> |                          | Sibship analyses <sup>b</sup> |                          |
|-------------------------------------------------------------------------|-----------------------------------------------------------------|--------|--------------|-------------------------------|--------------------------|-------------------------------|--------------------------|
|                                                                         |                                                                 |        |              | Unadjusted                    | Adjusted <sup>c</sup>    | Unadjusted                    | Adjusted <sup>c</sup>    |
|                                                                         |                                                                 |        |              | Mean difference (95% CI)      | Mean difference (95% CI) | Mean difference (95% CI)      | Mean difference (95% CI) |
| Gestational age in days                                                 | ART multiples                                                   | 8279   | 252.3 (23.7) | Ref                           | Ref                      | Ref                           | Ref                      |
|                                                                         | ART singletons without VTS                                      | 16 038 | 276.6 (16.6) | 24.0 (23.4, 24.5)             | 23.8 (23.3, 24.4)        | 24.6 (23.5, 25.7)             | 24.29 (23.2, 25.4)       |
|                                                                         | ART singleton with VTS                                          | 583    | 275.0 (18.5) | 22.9 (21.5, 24.3)             | 22.8 (21.4, 24.2)        | 24.6 (22.2, 26.9)             | 24.29 (22.0, 26.6)       |
|                                                                         | ART singleton with uncertain vanishing twin status <sup>d</sup> | 2305   | 277.2 (16.7) | 24.3 (23.5, 25.2)             | 24.4 (23.5, 25.2)        | 24.0 (22.1, 25.8)             | 23.97 (22.1, 25.8)       |
| Birth weight in grams                                                   | ART multiples                                                   | 8916   | 2462 (659)   | Ref                           | Ref                      | Ref                           | Ref                      |
|                                                                         | ART singletons without VTS                                      | 17 154 | 3443 (637)   | 954 (936, 973)                | 963 (945, 982)           | 890 (851, 929)                | 992 (952, 1032)          |
|                                                                         | ART singleton with VTS                                          | 632    | 3316 (698)   | 845 (796, 894)                | 854 (805, 902)           | 789 (704, 874)                | 891 (808, 974)           |
|                                                                         | ART singleton with uncertain vanishing twin status <sup>d</sup> | 2451   | 3441 (648)   | 951 (922, 981)                | 973 (943, 1002)          | 864 (797, 930)                | 1000 (934, 1067)         |
| Birth weight standardized z-score by gender, gestational age and parity | ART multiples                                                   | 8188   | -0.6 (0.8)   | Ref                           | Ref                      | Ref                           | Ref                      |
|                                                                         | ART singletons without VTS                                      | 16 006 | 0.0 (1.0)    | 0.7 (0.7, 0.7)                | 0.7 (0.7, 0.7)           | 0.7 (0.7, 0.8)                | 0.8 (0.7, 0.8)           |
|                                                                         | ART singleton with VTS                                          | 583    | -0.1 (1.0)   | 0.6 (0.5, 0.6)                | 0.6 (0.5, 0.6)           | 0.5 (0.4, 0.7)                | 0.6 (0.4, 0.7)           |
|                                                                         | ART singleton with uncertain vanishing twin status <sup>d</sup> | 2299   | 0.0 (1.0)    | 0.7 (0.6, 0.7)                | 0.7 (0.6, 0.7)           | 0.7 (0.6, 0.9)                | 0.8 (0.7, 0.9)           |

VTS, vanishing twin syndrome.

<sup>a</sup>The overall analyses was conducted using random-effects linear regression, comparing the means among the three groups of ART singletons to all ART multiples.

<sup>b</sup>The sibship analyses was conducted using fixed-effects linear regression, comparing the means among the three groups of ART singletons to their siblings who were ART multiples.

<sup>c</sup>Adjusted for maternal age, marital status, parity, year of birth and chronic diseases before pregnancy (asthma, hypertension, heart disease, kidney disease, rheumatoid arthritis, epilepsy, thyroid disease and diabetes).

<sup>d</sup>When information from the early ultrasound was missing, the status of VTS was defined as 'uncertain'.
